# Supplementary material
Source: publisher figshare collection journal article supplement (https://acs.figshare.com/ndownloader/files/3770329)

# Supporting Information

## Naked-Eye and Near-Infrared Fluorescence Probe for Hydrazine and Its Applications in *In Vitro* and *In Vivo* Bioimaging

Jianjian Zhang<sup>a</sup>, Lulu Ning<sup>a</sup>, Jiting Liu<sup>b</sup>, Jianxi Wang<sup>a</sup>, Bianfei Yu<sup>a</sup>, Xiaoyan Liu<sup>a</sup>,  
Xiaojun Yao<sup>a</sup>, Ziping Zhang<sup>b</sup>, Haixia Zhang<sup>a,\*</sup>

<sup>a</sup>State Key Laboratory of Applied Organic Chemistry, and Key Laboratory of Special Function Materials and Structure Design, Ministry of Education, Lanzhou University, Lanzhou 730000, China;

<sup>b</sup>Key Lab of Ministry of Education for Protection and Utilization of Special Biological Resources, Ningxia University, Yinchuan 750021, China.

\*Corresponding author

Tel.: +86 931 8912058;

Fax: +86 931 8912582.

E-mail: zhanghx@lzu.edu.cn

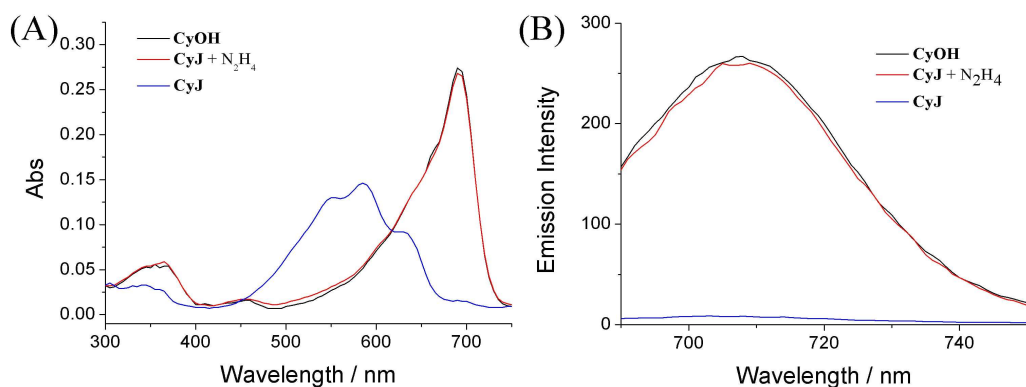

**Figure S1.** (A) Absorption and (B) fluorescence emission spectra of **CyOH** (5  $\mu$ M, black line) and **CyJ** (5  $\mu$ M), before (blue line) and after reacting with  $\text{N}_2\text{H}_4$  (150  $\mu$ M, red line) in  $\text{H}_2\text{O}/\text{DMSO}$  solution (4: 1, v/v, 10 mM HEPES, pH = 7.4),  $\lambda_{\text{ex}}$  = 675 nm.

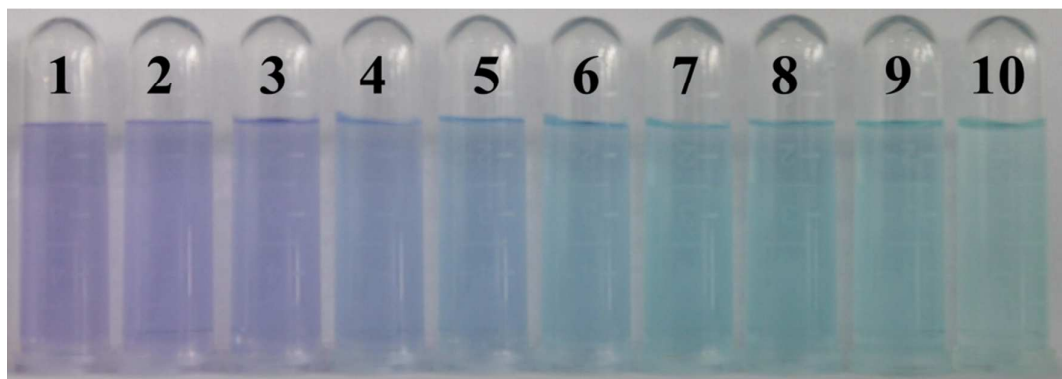

**Figure S2.** The color change of **CyJ** (5  $\mu$ M) upon addition of  $\text{N}_2\text{H}_4$  in HEPES (10 mM, pH = 7.4) containing 20% DMSO. Each picture was recorded at 10 min after the addition of  $\text{N}_2\text{H}_4$  (1-10 : 0, 0.5, 1.5, 2.0, 5.0, 15.0, 25.0, 50.0, 100.0, 250.0  $\mu$ M).

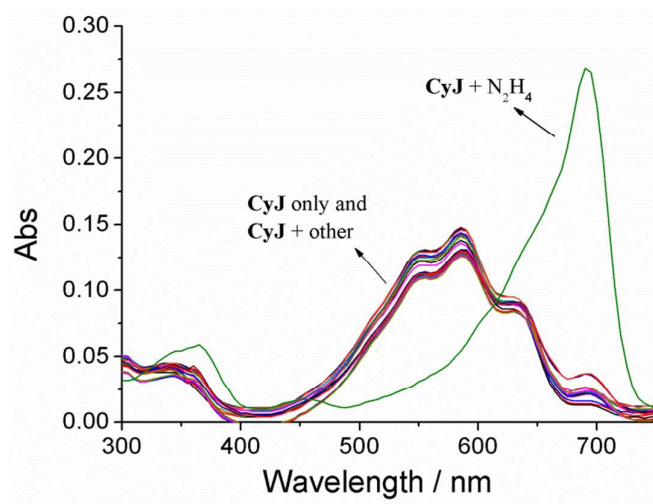

**Figure S3.** UV response of **CyJ** (5  $\mu\text{M}$ ) to various analytes (150  $\mu\text{M}$ ), each spectrum was recorded at 10 min after addition of the analytes ( $\text{N}_2\text{H}_4$ , Cys, GSH, Glu,  $\text{NH}_2\text{OH}$ , urea, aniline, thiourea,  $\text{K}^+$ ,  $\text{Na}^+$ ,  $\text{Ca}^{2+}$ ,  $\text{Mg}^{2+}$ ,  $\text{Cu}^{2+}$ ,  $\text{Zn}^{2+}$ ,  $\text{Al}^{3+}$ ,  $\text{Fe}^{3+}$ ,  $\text{Fe}^{2+}$ ,  $\text{Hg}^{2+}$ ,  $\text{F}^-$ ,  $\text{Br}^-$ ,  $\text{Cl}^-$ ,  $\text{I}^-$ ,  $\text{ClO}_4^-$ ,  $\text{SO}_4^{2-}$ ,  $\text{AcO}^-$ ,  $\text{CO}_3^{2-}$ ,  $\text{H}_2\text{PO}_4^-$ ,  $\text{N}_3^-$ ,  $\text{BF}_4^-$ );

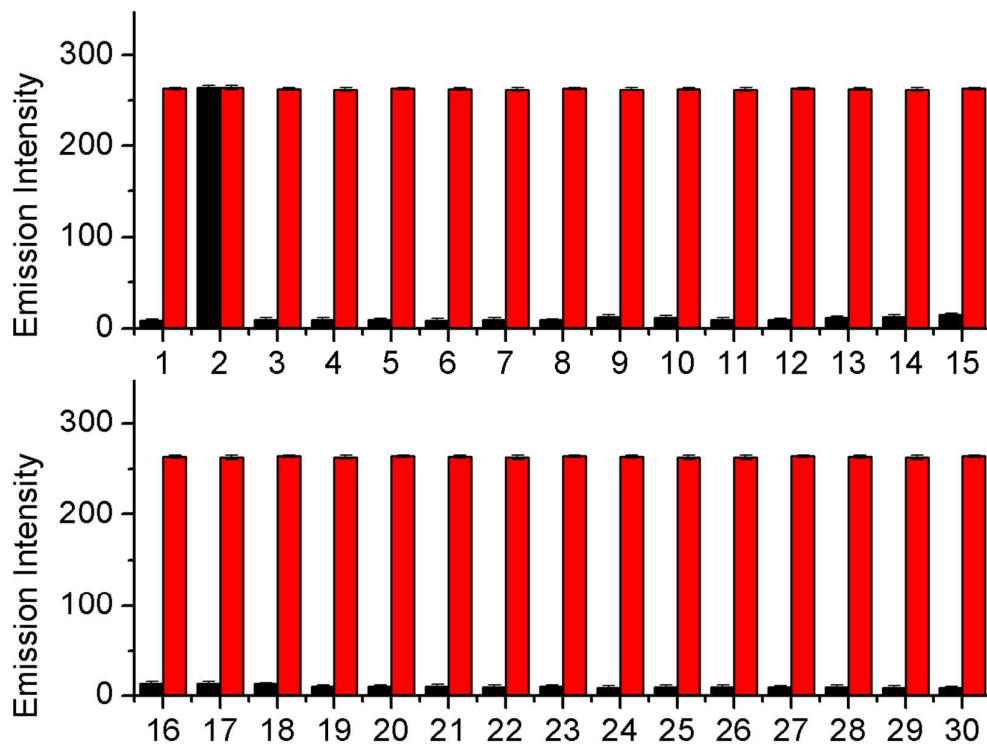

**Figure S4.** Fluorescence intensity of **CyJ** (5  $\mu\text{M}$ ) in the presence of various analytes (150  $\mu\text{M}$ ) ( $\text{N}_2\text{H}_4$ , Cys, GSH, Glu,  $\text{NH}_2\text{OH}$ , urea, aniline, thiourea,  $\text{K}^+$ ,  $\text{Na}^+$ ,  $\text{Ca}^{2+}$ ,  $\text{Mg}^{2+}$ ,  $\text{Cu}^{2+}$ ,  $\text{Zn}^{2+}$ ,  $\text{Al}^{3+}$ ,  $\text{Fe}^{3+}$ ,  $\text{Fe}^{2+}$ ,  $\text{Hg}^{2+}$ ,  $\text{F}^-$ ,  $\text{Br}^-$ ,  $\text{Cl}^-$ ,  $\text{I}^-$ ,  $\text{ClO}_4^-$ ,  $\text{SO}_4^{2-}$ ,  $\text{AcO}^-$ ,  $\text{CO}_3^{2-}$ ,  $\text{H}_2\text{PO}_4^-$ ,  $\text{N}_3^-$ ,  $\text{BF}_4^-$ ) in HEPES buffer (10 mM, pH = 7.40) containing 20% DMSO at 10 min,  $\lambda_{\text{ex}} = 675$  nm. Black bars represent the addition of 30 equiv of the appropriate analytes (1 : Blank, 2 :  $\text{N}_2\text{H}_4$ , 3 : Cys, 4 : GSH, 5 : Glu, 6 :

NH<sub>2</sub>OH, 7 : urea, 8 : aniline, 9 : thiourea, 10 : K<sup>+</sup>, 11 : Na<sup>+</sup>, 12 : Ca<sup>2+</sup>, 13 : Mg<sup>2+</sup>, 14 : Cu<sup>2+</sup>, 15 : Zn<sup>2+</sup>, 16 : Al<sup>3+</sup>, 17 : Fe<sup>3+</sup>, 18 : Fe<sup>2+</sup>, 19 : Hg<sup>2+</sup>, 20 : F<sup>-</sup>, 21 : Br<sup>-</sup>, 22 : Cl<sup>-</sup>, 23 : I<sup>-</sup>, 24 : ClO<sub>4</sub><sup>-</sup>, 25 : SO<sub>4</sub><sup>2-</sup>, 26 : AcO<sup>-</sup>, 27 : CO<sub>3</sub><sup>2-</sup>, 28 : H<sub>2</sub>PO<sub>4</sub><sup>-</sup>, 29 : N<sub>3</sub><sup>-</sup>, 30 : BF<sub>4</sub><sup>-</sup>) to a 5  $\mu$ M solution of **CyJ**. Red bars represent the addition of **CyJ** (5  $\mu$ M) to the mixture solution of 150  $\mu$ M the appropriate analytes and 150  $\mu$ M N<sub>2</sub>H<sub>4</sub>. The data were reported as the mean  $\pm$  standard deviation of triplicate experiments.

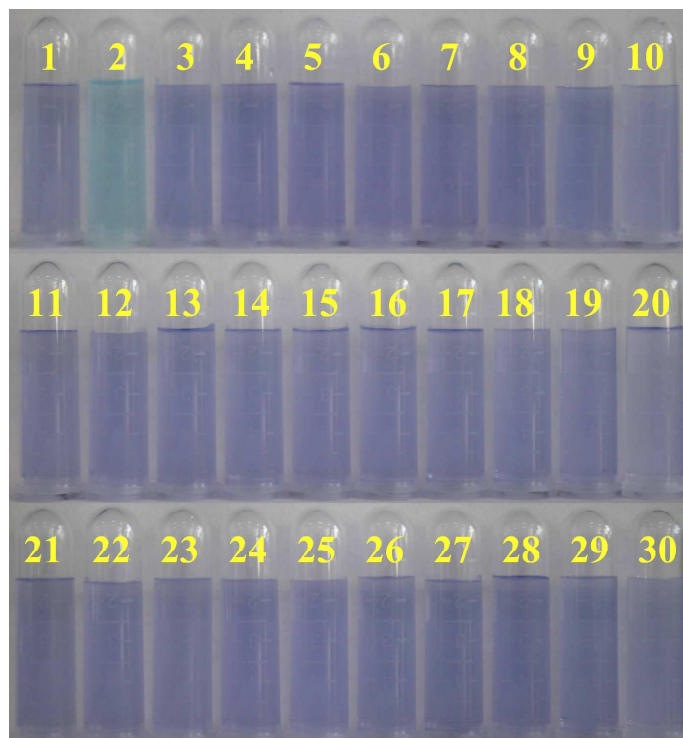

**Figure S5.** The color change of **CyJ** (5  $\mu$ M) with various analytes (150  $\mu$ M). The pictures were recorded at 10 min after addition of the analytes (1 : Blank, 2 : N<sub>2</sub>H<sub>4</sub>, 3 : Cys, 4 : GSH, 5 : Glu, 6 : NH<sub>2</sub>OH, 7 : urea, 8 : aniline, 9 : thiourea, 10 : K<sup>+</sup>, 11 : Na<sup>+</sup>, 12 : Ca<sup>2+</sup>, 13 : Mg<sup>2+</sup>, 14 : Cu<sup>2+</sup>, 15 : Zn<sup>2+</sup>, 16 : Al<sup>3+</sup>, 17 : Fe<sup>3+</sup>, 18 : Fe<sup>2+</sup>, 19 : Hg<sup>2+</sup>, 20 : F<sup>-</sup>, 21 : Br<sup>-</sup>, 22 : Cl<sup>-</sup>, 23 : I<sup>-</sup>, 24 : ClO<sub>4</sub><sup>-</sup>, 25 : SO<sub>4</sub><sup>2-</sup>, 26 : AcO<sup>-</sup>, 27 : CO<sub>3</sub><sup>2-</sup>, 28 : H<sub>2</sub>PO<sub>4</sub><sup>-</sup>, 29 : N<sub>3</sub><sup>-</sup>, 30 : BF<sub>4</sub><sup>-</sup>).

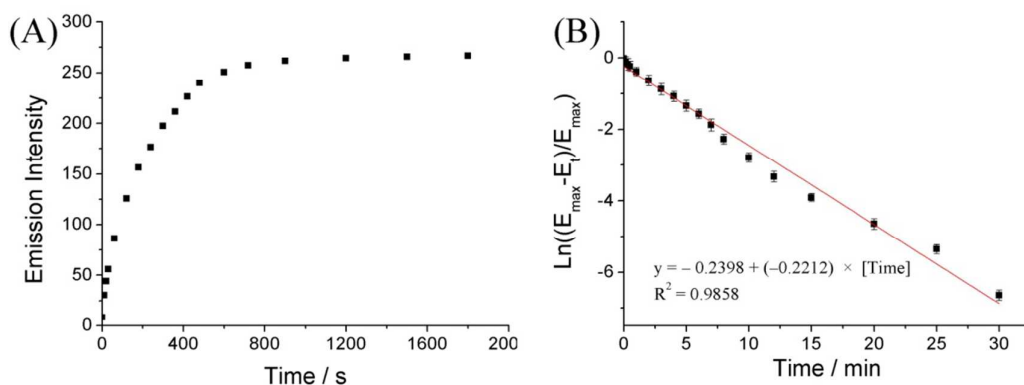

**Figure S6.** (A) Time-dependent fluorescence changes of **CyJ** (5  $\mu\text{M}$ ) upon addition of  $\text{N}_2\text{H}_4$  (150  $\mu\text{M}$ ) in HEPES (10 mM, pH 7.4) containing 20% DMSO.  $\lambda_{\text{ex}} = 675 \text{ nm}$ ,  $\lambda_{\text{em}} = 706 \text{ nm}$ . (B) Pseudo first-order kinetic plot of reaction of probe **CyJ** (5  $\mu\text{M}$ ) with  $\text{N}_2\text{H}_4$  (150  $\mu\text{M}$ ), for  $k = 24.6 \text{ M}^{-1}\text{s}^{-1}$ .

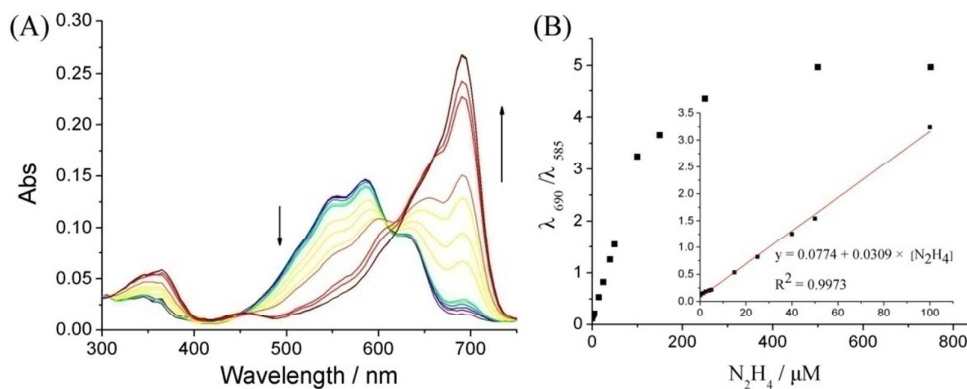

**Figure S7.** (A) UV titration of **CyJ** (5  $\mu\text{M}$ ) upon addition of  $\text{N}_2\text{H}_4$  in HEPES (10 mM, pH = 7.4) containing 20% DMSO. Each spectrum was recorded at 10 min after the addition of  $\text{N}_2\text{H}_4$  (0, 0.5, 1.5, 2.5, 4, 5, 15, 25, 40, 50, 100, 150, 250, 500, 750  $\mu\text{M}$ ). (B) Absorbance ratio  $R (\lambda_{690}/\lambda_{585})$  changes of **CyJ** upon addition of  $\text{N}_2\text{H}_4$ . Inset: Absorbance ratio  $R (\lambda_{690}/\lambda_{585})$  changes of **CyJ** as a function of concentrations of  $\text{N}_2\text{H}_4$  (0–100  $\mu\text{M}$ ).

HPLC was carried out using a C18 column (Hedera·ODS-2, 5  $\mu\text{m}$ , 250 mm  $\times$  4.6 mm) with a Varian 210 HPLC system. The mobile phase was a mixture of acetonitrile and ammonium acetate buffer (0.025 M, pH = 6.0) (8:2, v/v). The flow rate was 1 mL/min and detection at 613 nm. The reaction solutions of **CyJ** (5  $\mu\text{M}$ ) and  $\text{N}_2\text{H}_4$  (25  $\mu\text{M}$ , 150  $\mu\text{M}$ ) in HEPES buffer (10 mM, pH = 7.4) was as the samples.

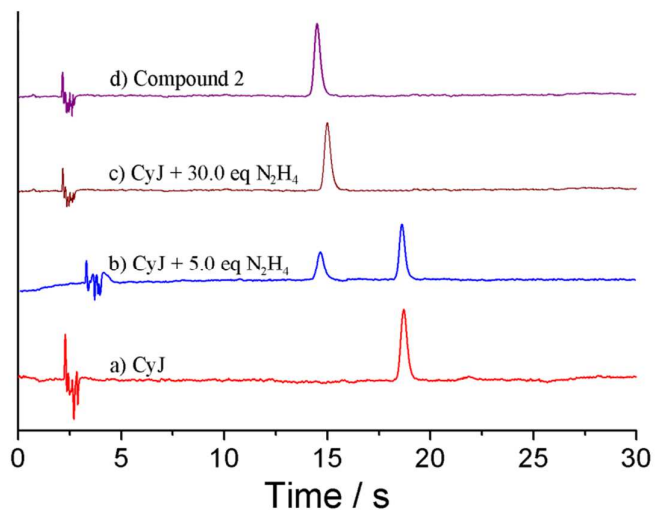

**Figure S8.** HPLC chromatograms of **CyJ** (a), the reaction solutions of **CyJ** with different amount of  $\text{N}_2\text{H}_4$  (b, c), and **CyOH** (d). Conditions: incubation for 10 min at room temperature in HEPES (10 mM, pH = 7.4) containing 20% DMSO.

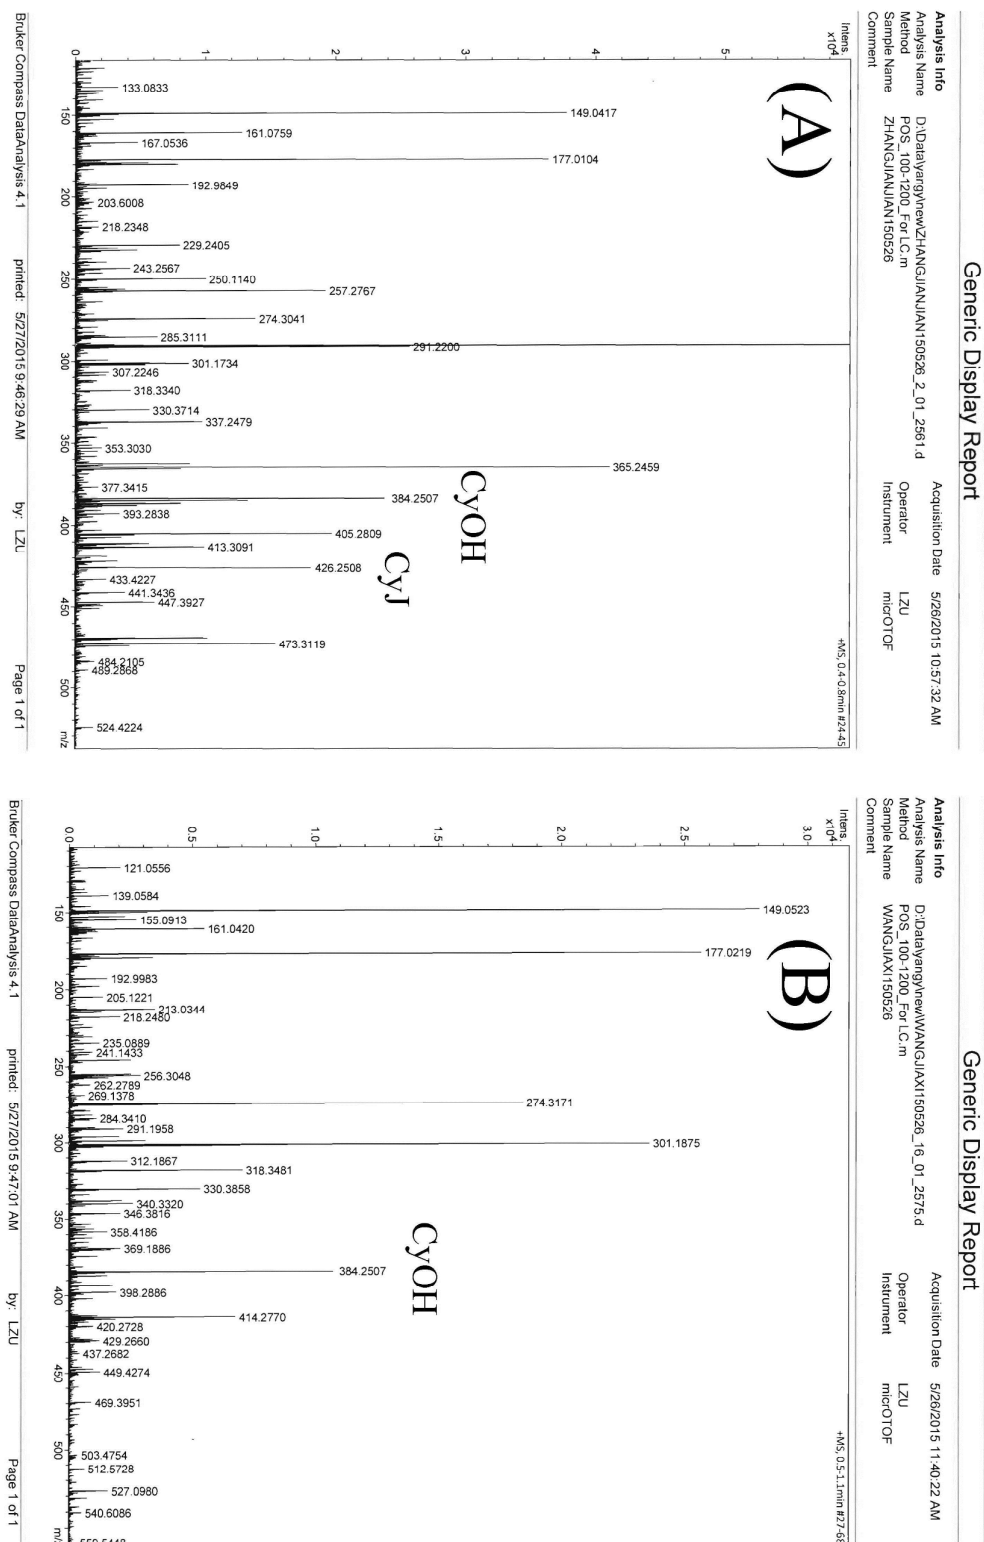

**Analysis Info**

Analysis Name: D:\Data\yangnew\WANGJIAJI150526\_16\_01\_2575.d  
 Method: POS\_100-1200\_For LC.m  
 Sample Name: WANGJIAJI150526  
 Comment:

Acquisition Date: 5/26/2015 11:40:22 AM  
 Operator: LZU  
 Instrument: micrOTOF

**Generic Display Report**

**Figure S9.** The micrOTOF mass spectra of **CyJ** treating with  $N_2H_4$ . (A) **CyJ** + 5.0 equiv  $N_2H_4$ ; (B) **CyJ** + 30.0 equiv  $N_2H_4$ .

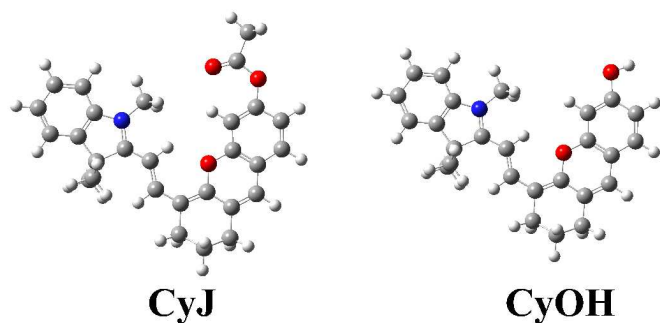

**Figure S10.** The optimized conformation of **CyJ** and **CyOH**. In the ball-and-stick model, carbon, oxygen and nitrogen atoms are colored in gray, red and blue, respectively.

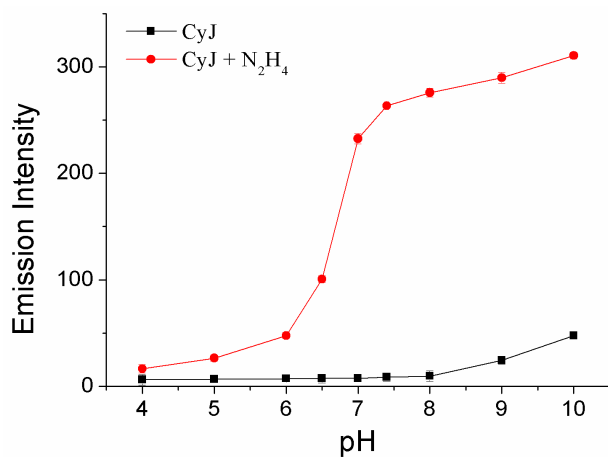

**Figure S11.** Fluorescence intensity of **CyJ** (■) and **CyJ** (5  $\mu$ M) with  $\text{N}_2\text{H}_4$  (150  $\mu$ M, ●) in 10 min at various pH values, respectively. The data were reported as the mean  $\pm$  standard deviation of triplicate experiments.

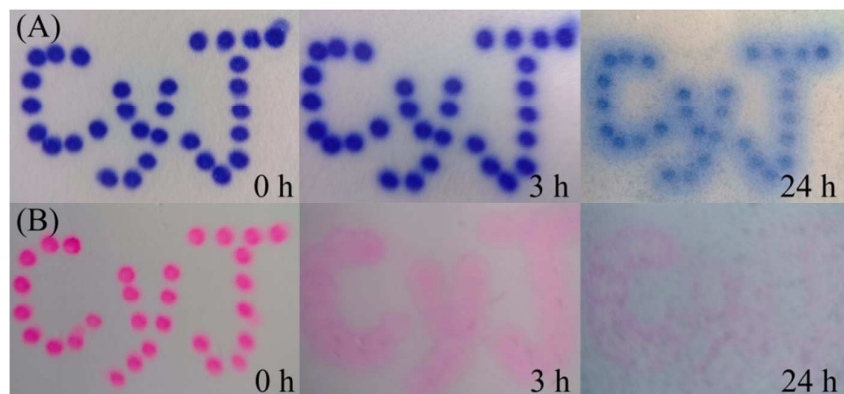

**Figure S12.** Diffusion-resistance experiments for **CyJ** (A) and Rhodamine **B** (B). The compounds were spotted on silica-gel plates, immersed in water.



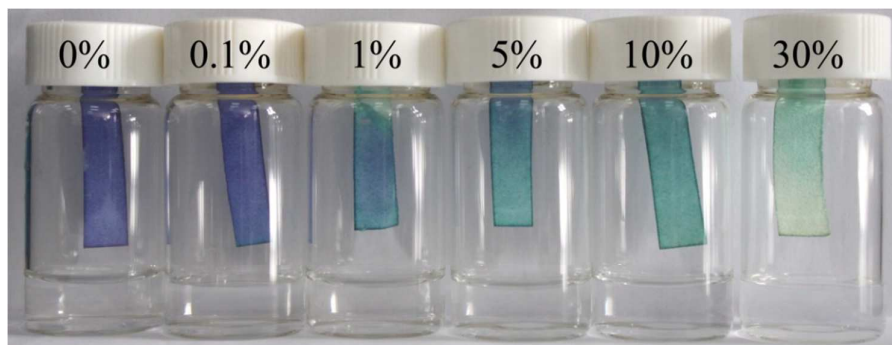

**Figure S13.** Color changes of CyJ (1.0 mM) coated filter paper after exposure to different concentrations of hydrazine aqueous solution.

**Table S1. Determination of hydrazine in water samples <sup>a</sup>**

| Sample                                                   | Hydrazine added<br>( $\mu\text{M}$ ) | Hydrazine found<br>( $\mu\text{M}$ ) | Recovery<br>(%) | R.S.D.<br>(%) <sup>b</sup> |
|----------------------------------------------------------|--------------------------------------|--------------------------------------|-----------------|----------------------------|
| Tap water                                                | 5.0                                  | 5.21                                 | 104             | 1.7                        |
|                                                          | 30.0                                 | 29.75                                | 99              | 2.1                        |
| Yellow River water                                       | 5.0                                  | 5.24                                 | 105             | 2.2                        |
|                                                          | 30.0                                 | 30.95                                | 103             | 2.5                        |
| Diluted Human<br>Serum (10%)                             | 5.0                                  | 5.12                                 | 102             | 2.5                        |
|                                                          | 30.0                                 | 31.80                                | 106             | 2.1                        |
| Sample 1 <sup>c</sup><br>(hydrazine 5.0 $\mu\text{M}$ )  | 5.0                                  | 9.76                                 | 98              | 1.7                        |
|                                                          | 30.0                                 | 35.89                                | 103             | 1.7                        |
| Sample 2 <sup>c</sup><br>(hydrazine 10.0 $\mu\text{M}$ ) | 5.0                                  | 15.26                                | 102             | 2.1                        |
|                                                          | 30.0                                 | 41.98                                | 105             | 2.4                        |

<sup>a</sup> Conditions:  $\lambda_{\text{ex}}/\lambda_{\text{em}} = 675/706$  nm, DMSO/HEPES = 20:80, 10 min reaction at 25 °C.

<sup>b</sup> Each condition was measured three times.

<sup>c</sup> Synthetic samples containing other metal ions (common metal ions in serum:  $\text{K}^+$ ,  $\text{Na}^+$ ,  $\text{Ca}^{2+}$ ,  $\text{Mg}^{2+}$ ,  $\text{Cu}^{2+}$ ,  $\text{Zn}^{2+}$ ,  $\text{Al}^{3+}$ ,  $\text{Fe}^{3+}$ ,  $\text{Fe}^{2+}$ ) in HEPES buffer containing 20% DMSO.

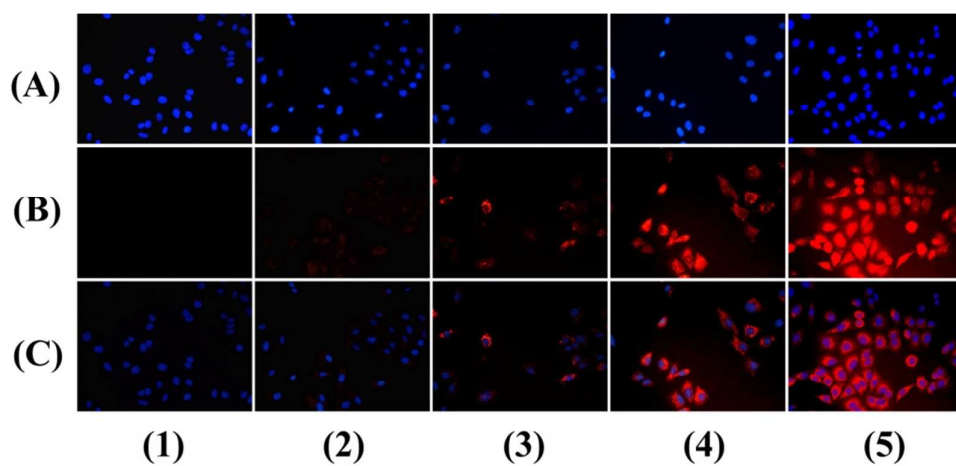

**Figure S14.** Confocal microscope images of pretreated *HeLa* cells with different concentration of  $\text{N}_2\text{H}_4$  (2-5: 0.0, 5.0, 30.0, 150.0  $\mu\text{M}$ ) for 15 min, then incubated with CyJ (10  $\mu\text{M}$ ) for another 15 min; 1: control. (A) Fluorescence images for cells co-stained with 4', 6-diamidino-2-phenylindole (DAPI) to identify cell nuclei (blue dots); (B) Fluorescence images from CyJ; (C) Merge.

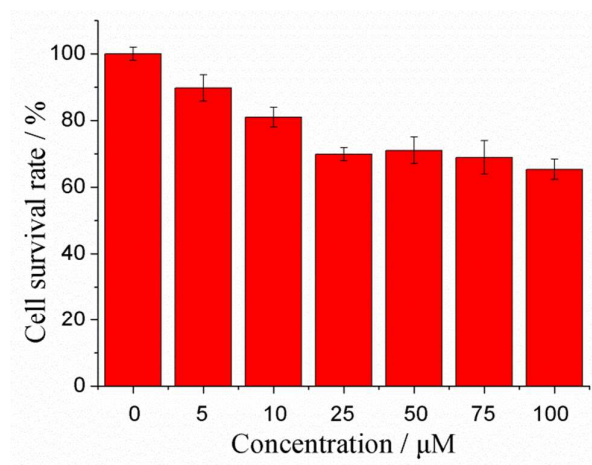

**Figure S15.** MTT assay for the survival rate of *HeLa* cells treated with various concentrations of CyJ for 24 h. Error bars represent the standard deviations of 6 trials.

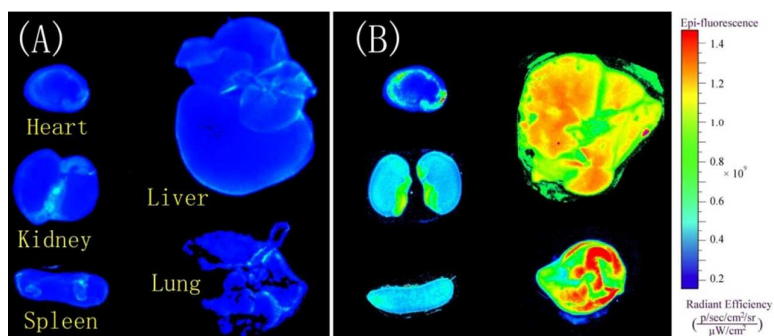

**Figure S16.** *In vivo* images of tissues from mouse incubated with **CyJ** (50  $\mu\text{M}$ ) or  $\text{N}_2\text{H}_4$  (300  $\mu\text{M}$ ). Fluorescence images of heart, kidney, spleen, liver, and lung. (A) The tissues not incubated with anything; (B) The tissues directly treated with **CyJ** (50  $\mu\text{M}$ ) and followed by incubated with  $\text{N}_2\text{H}_4$  (300  $\mu\text{M}$ ), each for 20 min.

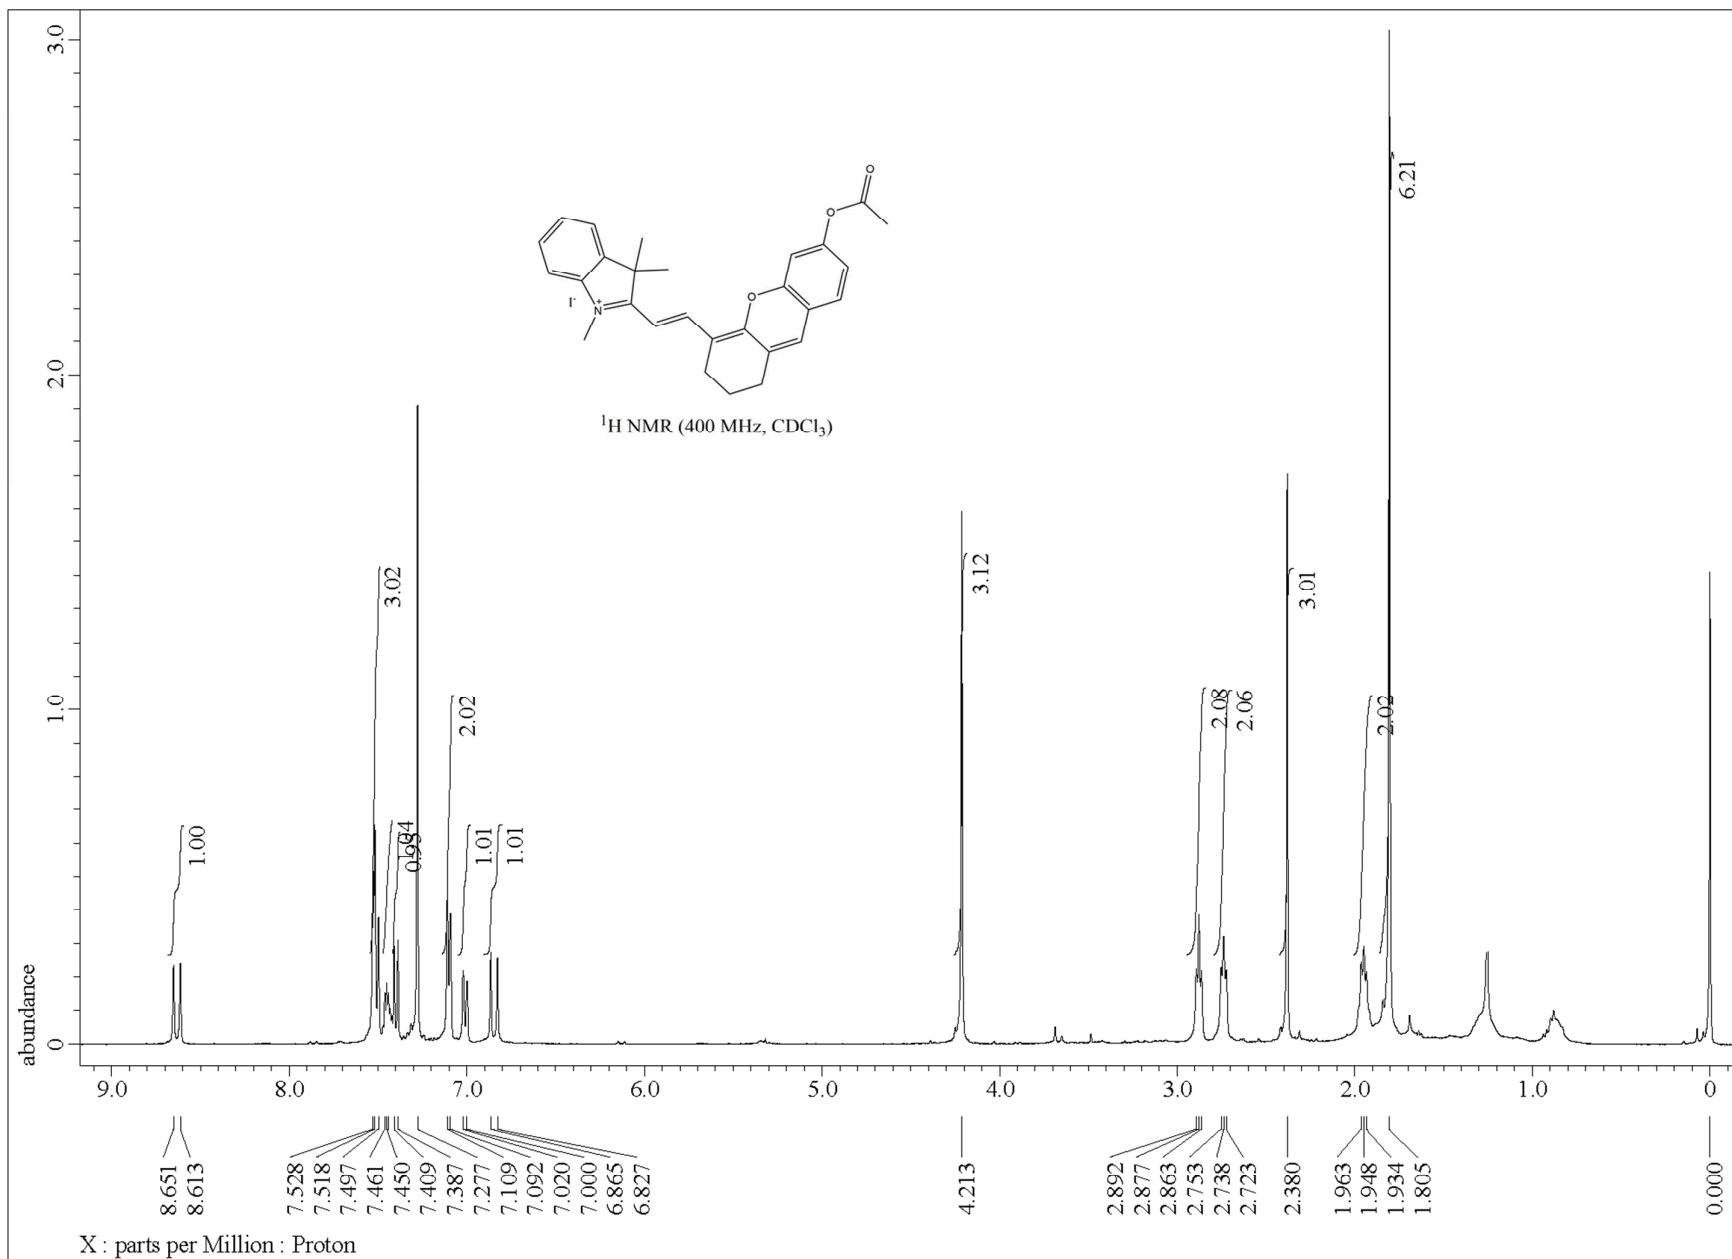

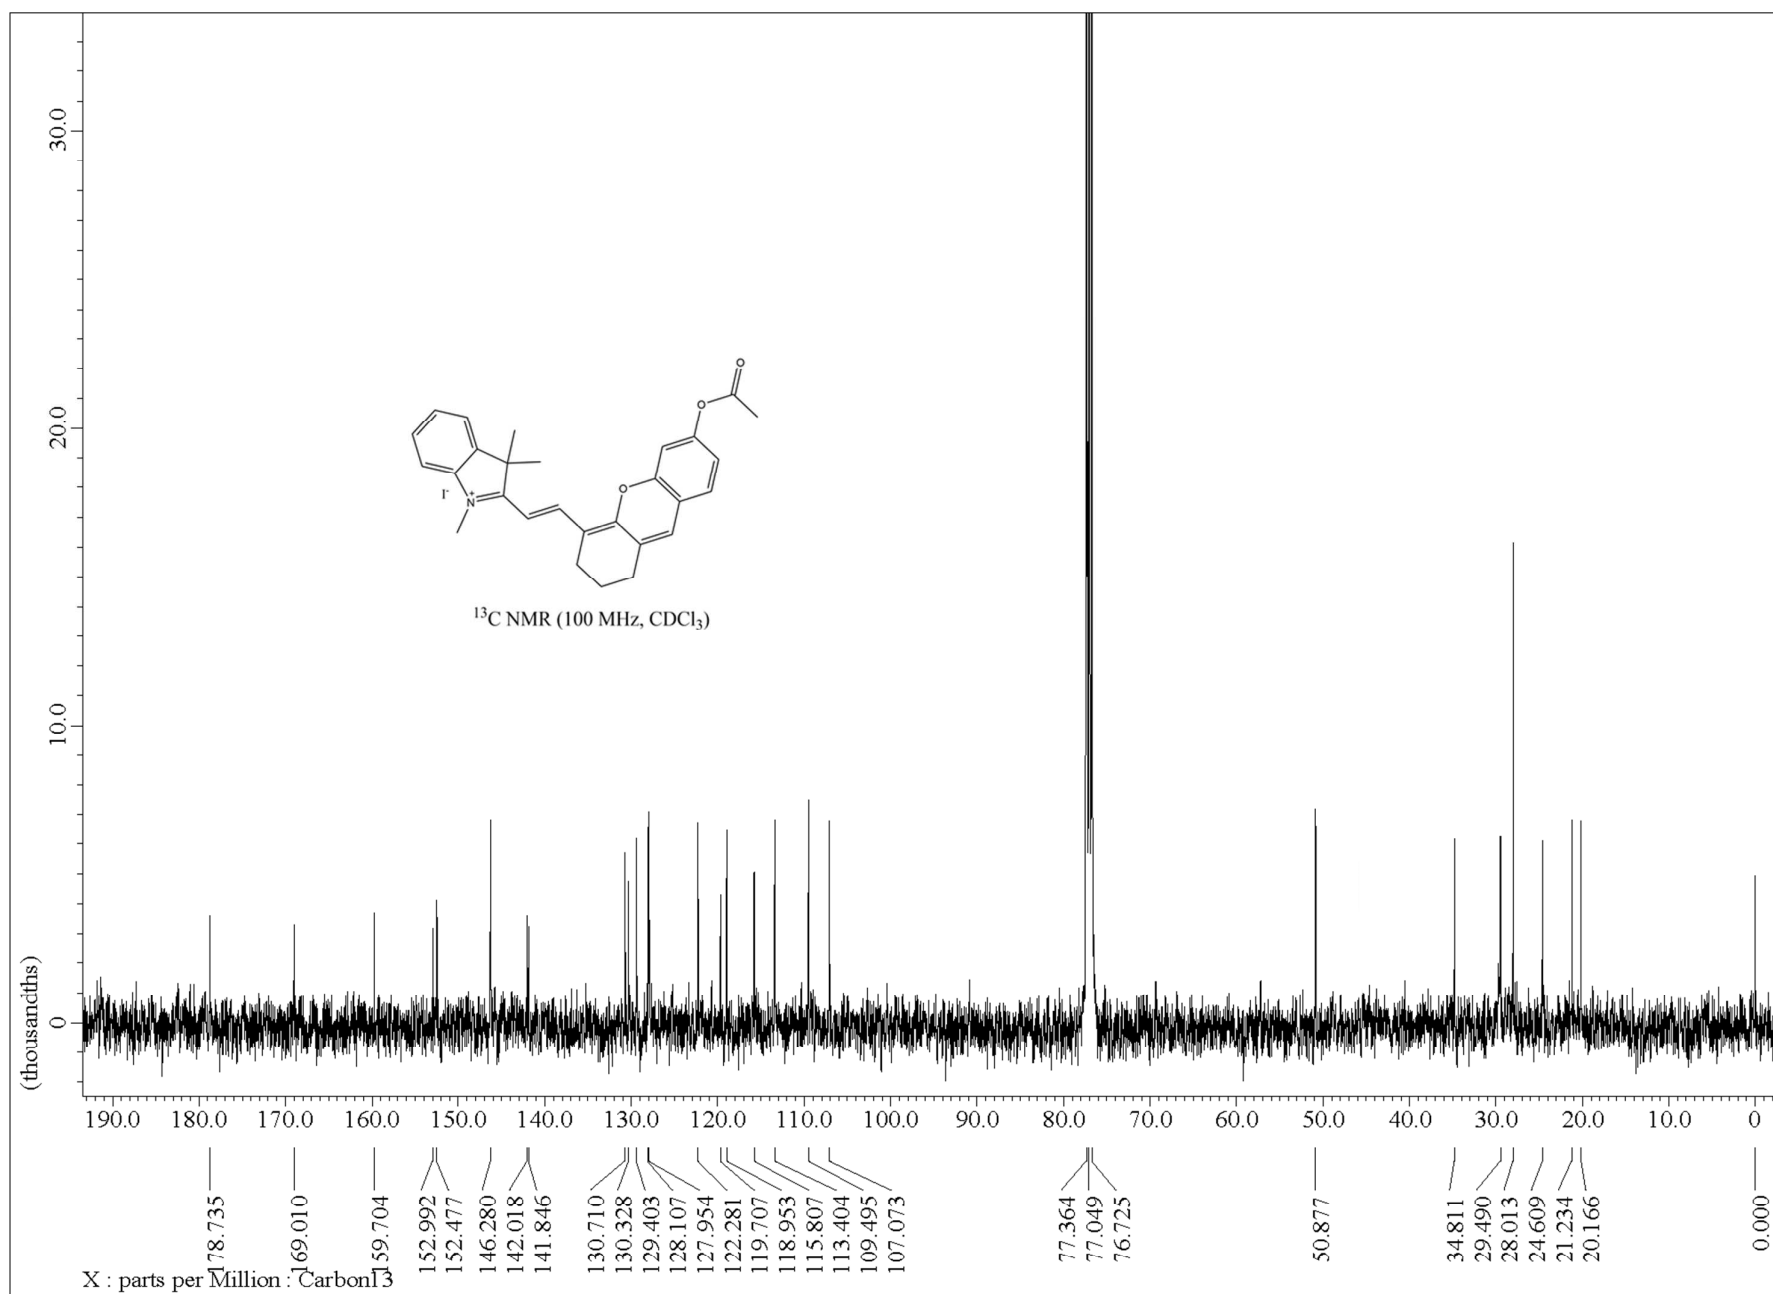

jianjian-1\_150528110106

5/28/2015 11:05:41 AM  
Error=1.2 ppm

NL:  
3.11E6  
zhangjianjian-  
1\_150528110106#14  
RT: 0.10 AV: 1 T:  
FTMS + c ESI Full ms  
[100.00-2000.00]

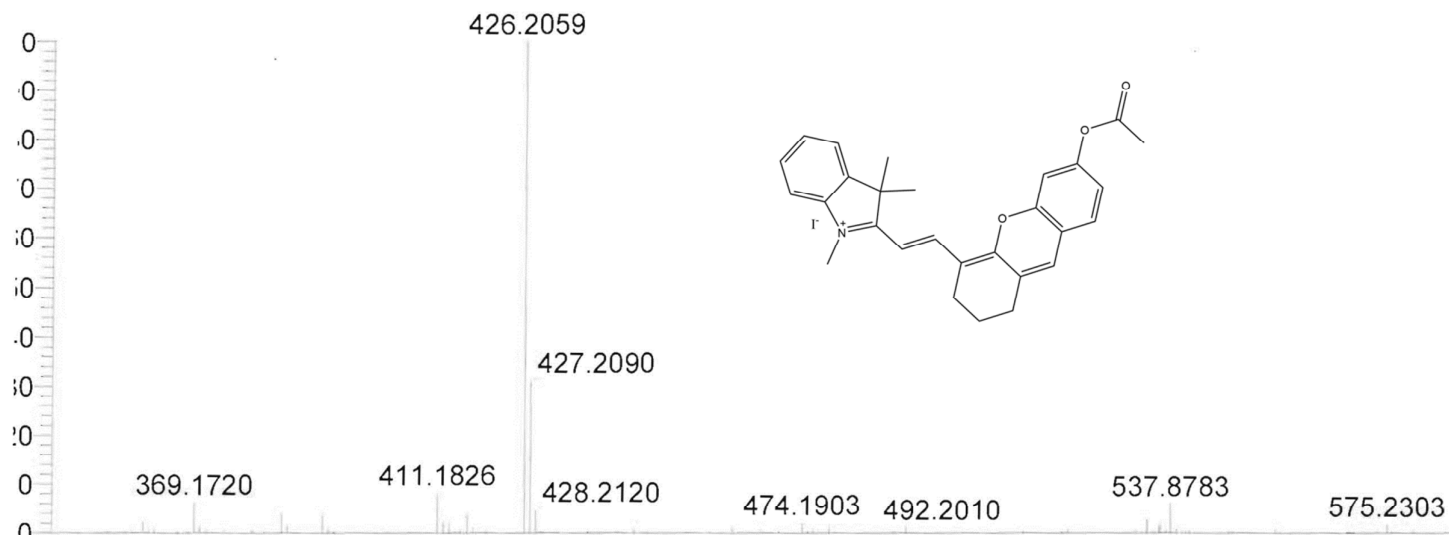

NL:  
7.29E5  
C<sub>28</sub> H<sub>28</sub> O<sub>3</sub> N<sub>1</sub>:  
C<sub>28</sub> H<sub>28</sub> O<sub>3</sub> N<sub>1</sub>  
pa Chrg 1

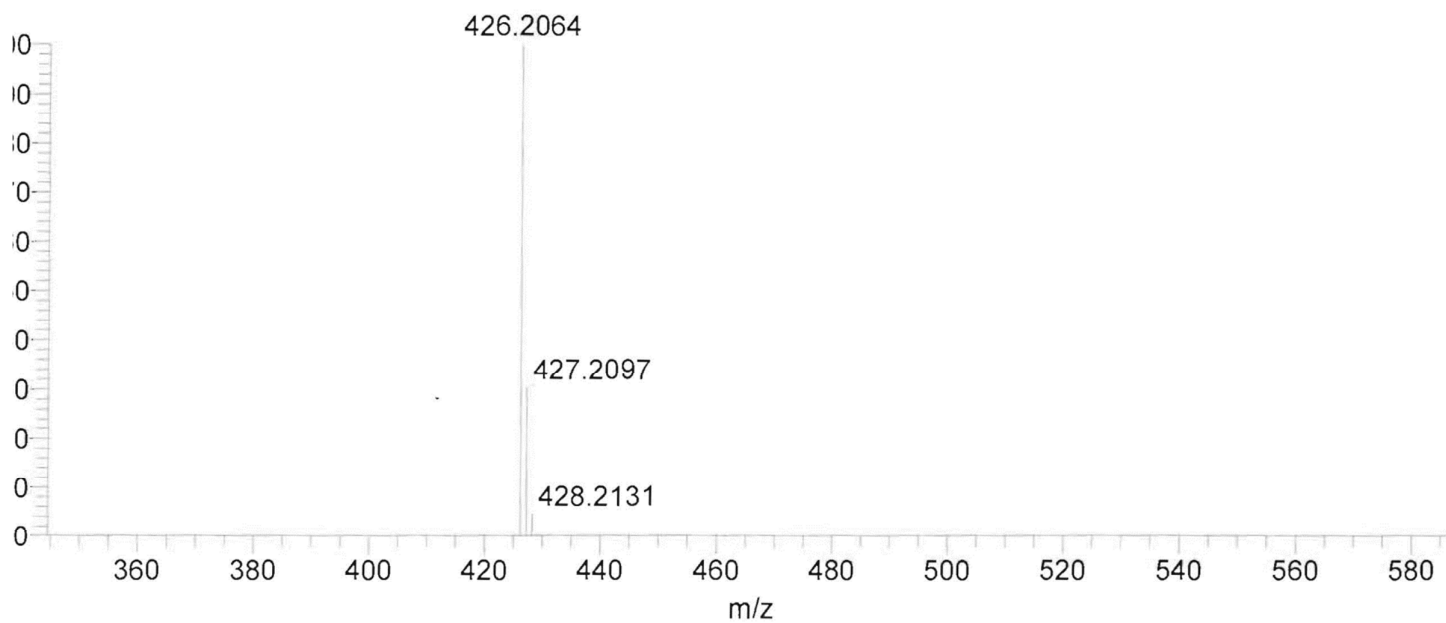

Supplement: Supplementary file 1 [file 3770329]
